# Supplementary material
Source: PubMed Central journal article supplement (PMC9798028)
Supplement: mmc1.pdf [file mmc1.pdf]

**Cell Reports Medicine, Volume 3**

**Supplemental information**

**Neutrophil profiles of pediatric COVID-19  
and multisystem inflammatory syndrome in children**

**Brittany P. Boribong, Thomas J. LaSalle, Yannic C. Bartsch, Felix Ellett, Maggie E. Loiselle, Jameson P. Davis, Anna L.K. Gonye, David B. Sykes, Soroush Hajizadeh, Johannes Kreuzer, Shiv Pillai, Wilhelm Haas, Andrea G. Edlow, Alessio Fasano, Galit Alter, Daniel Irimia, Moshe Sade-Feldman, and Lael M. Yonker**

# SUPPLEMENTAL FIGURES

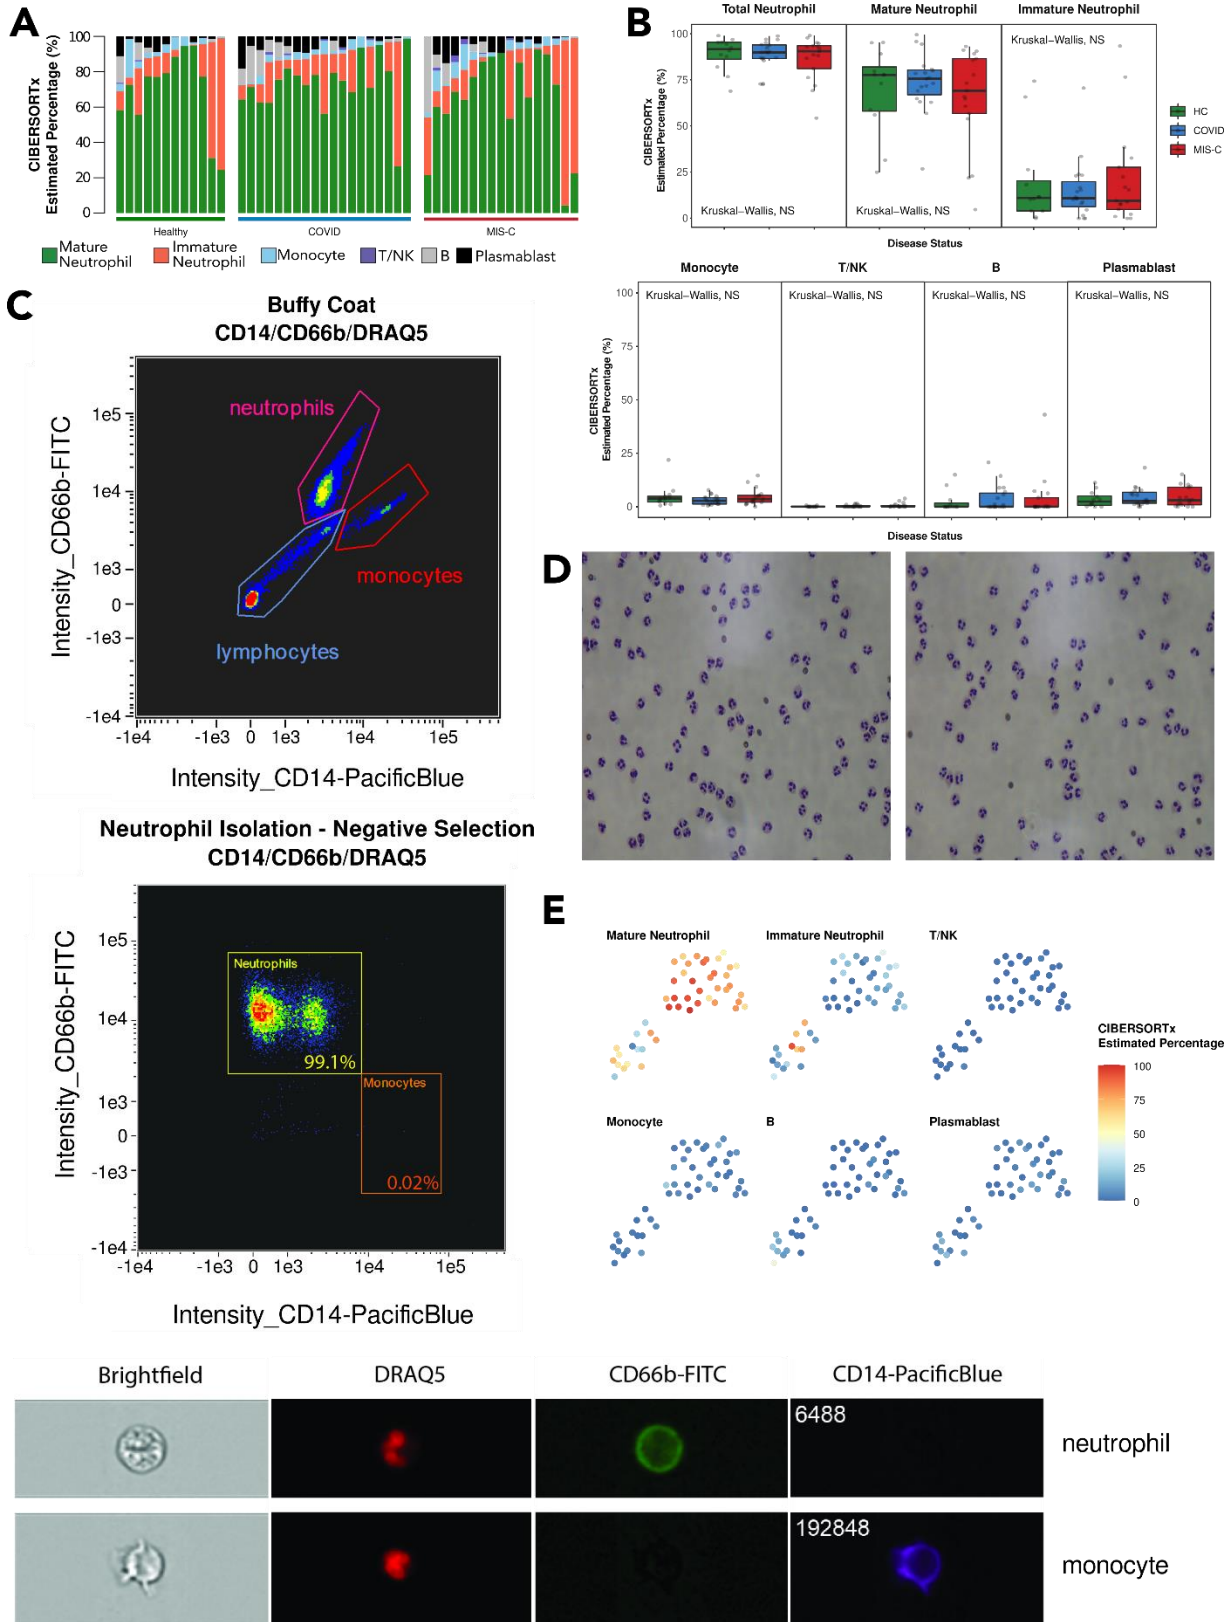

**Fig. S1. Neutrophil isolation and quality control for purity, related to Fig. 1.** (A) Bar plots displaying the distribution of the CIBERSORTx estimated cell type percentages for each sample. Samples are divided by disease status and ordered according to Total Neutrophil Content (sum of Mature and Immature neutrophil fractions). (B) Box plots showing the distribution of CIBERSORTx percentages for each cell type divided by disease status. No significant differences were found between disease grouping using the Kruskal-Wallis test. (C) Cells are gated on the nuclear stain, DRAQ5 (far red). Top: population of nucleated cells from the buffy coat. Bottom: population of isolated neutrophils after negative selection, confirming the high purity of neutrophil population. Neutrophils are identified by CD66b (FITC) and monocytes by CD14 (Pacific Blue). Numbers in the top left corner of the CD-14 Pacific Blue image represent the event number of the captured cell. (D) Geimsa staining of isolated neutrophil sample (neutrophils stained blue/purple and eosinophils stained pink). (E) CIBERSORTx estimated cell type percentages.

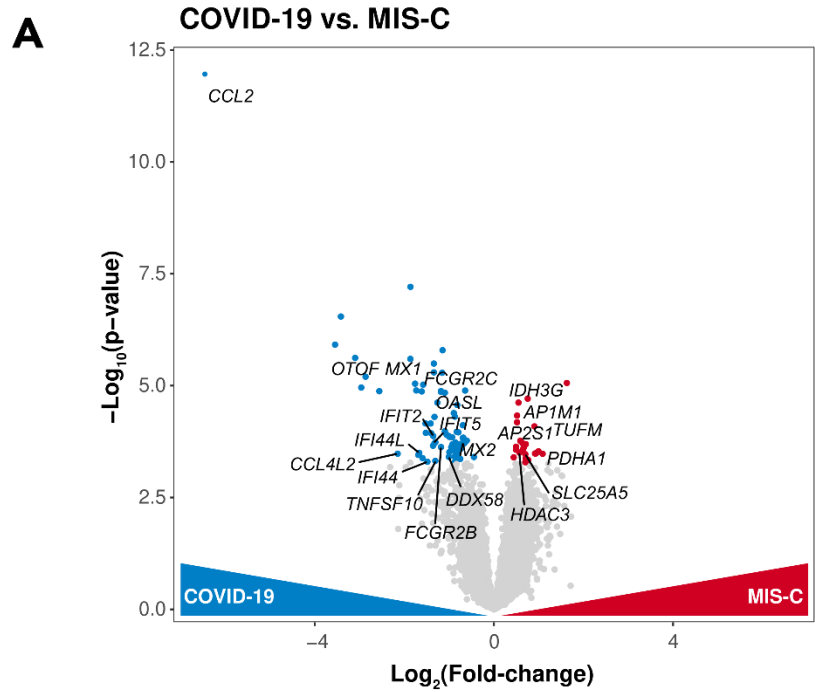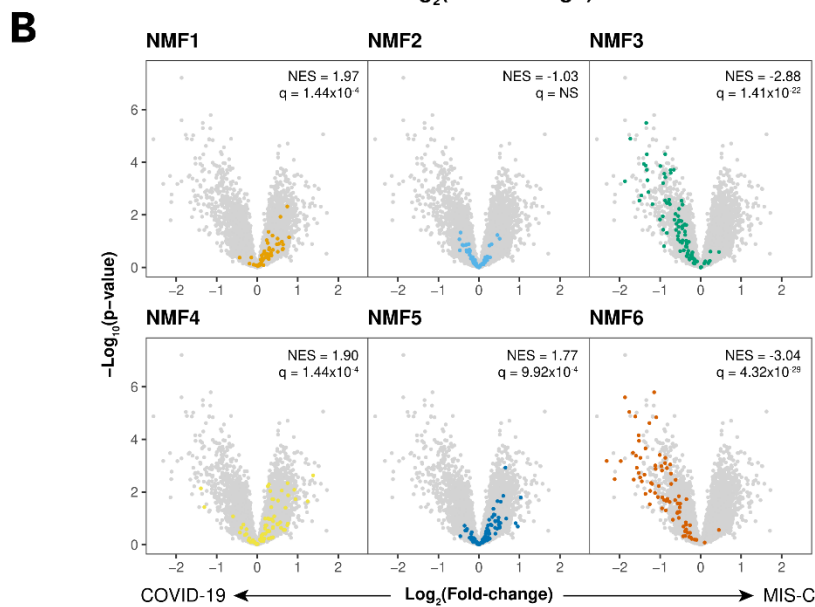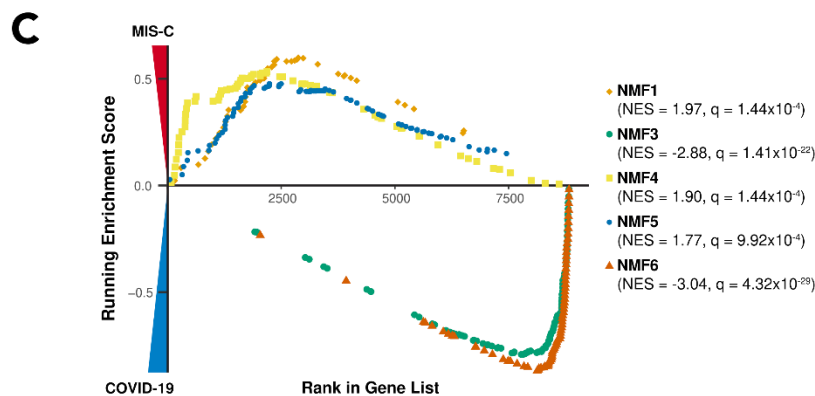

**Fig. S2. Direct comparison of acute pediatric COVID-19 and MIS-C, Related to Fig. 3.** (A) Volcano plot showing differentially expressed genes between MIS-C samples and acute pediatric COVID-19 samples. Color-coded points indicate genes that pass FDR correction with  $q < 0.05$ . (B) Color-coded points in the volcano plot of differentially expressed genes between acute pediatric COVID-19 and MIS-C by whether the gene is a marker for one of the NMF subtypes with axis limits set to  $\pm 3 \text{ Log}_2(\text{fold-change})$ . (C) GSEA enrichment plots for the NMF1 (Pro-Neu), NMF3 (PD-L1+ ISG+), NMF4 (Immature), NMF5 (G-MDSC), and NMF6 (ISG+) signatures, all of which passed FDR correction as indicated.

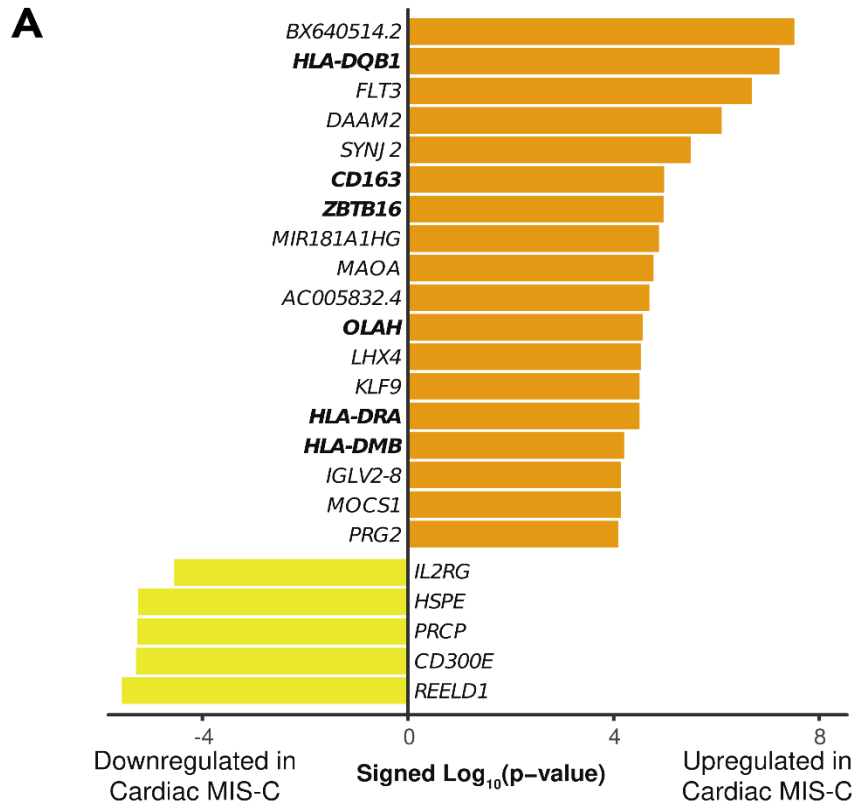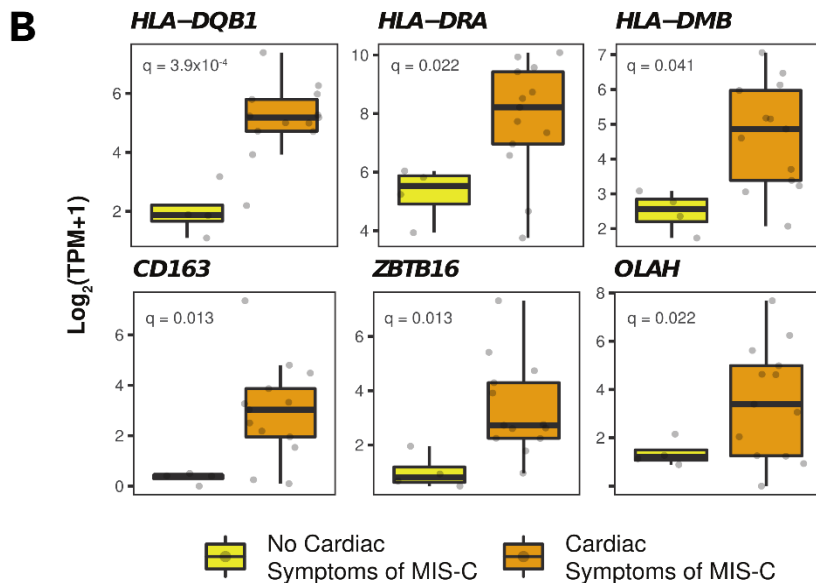

**Fig. S3. Comparison of MIS-C, acute pediatric COVID-19, and healthy children Related to Fig. 3. (A)** Bar plots displaying the top differentially expressed genes between samples from MIS-C patients with and without cardiac involvement of disease. Bar length corresponds to the signed  $\log_{10}(p\text{-value})$  for the differential expression analysis. Bolded genes are displayed individually in (B). **(B)** Box plots of  $\log_2(\text{TPM}+1)$  values for selected genes differentially expressed in (A). FDR q-values are from DESeq2.

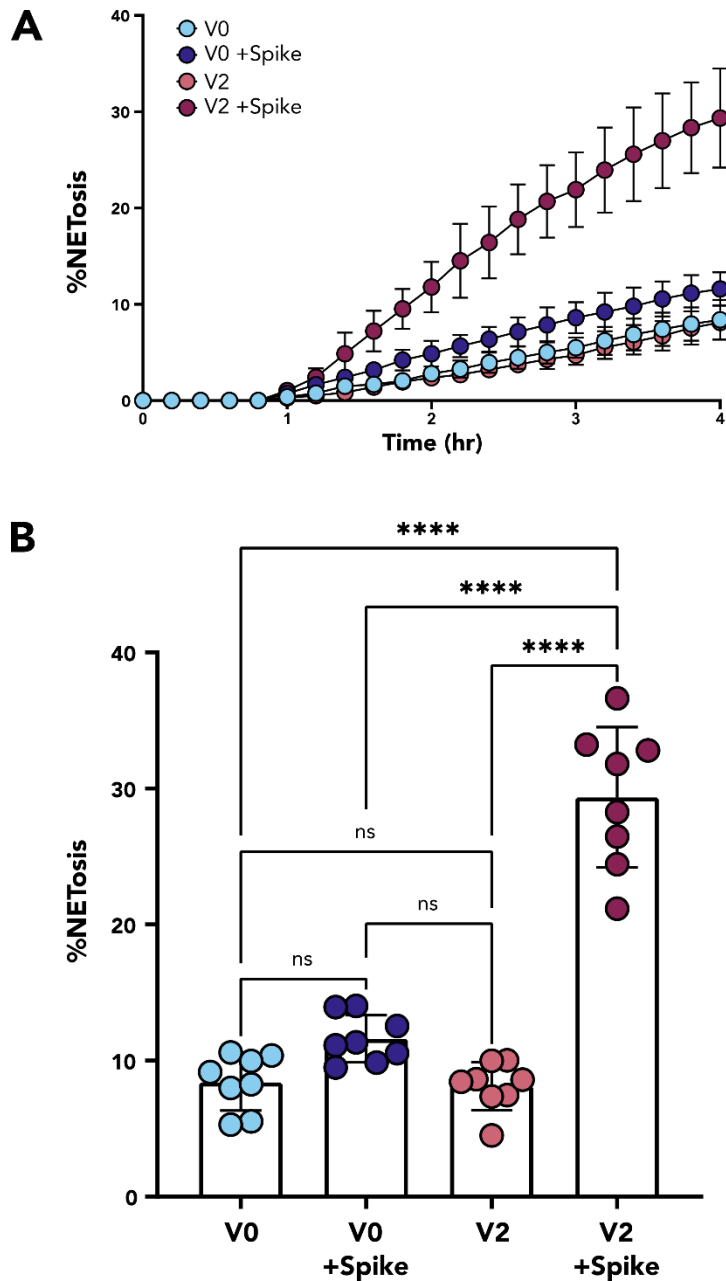

**Fig. S4. Quantification of NETosis in neutrophils stimulated with matched pre- and post-vaccine plasma, related to Fig. 5.** Paired plasma samples were collected from children 12-15 years of age prior to vaccination (V0) and 2-4 weeks after the 2nd dose (V2) with the Pfizer BNT162b2 vaccine series. None of the children had prior COVID-19. **(A)** Temporal dynamics of NET release in neutrophils ( $n = 8$ ) stimulated with V0 plasma, V0-plasma-coated Spike beads, V2 plasma, and V2-plasma-coated Spike beads. **(B)** End-point percentage of NET release in neutrophils ( $n = 8$ ) stimulated with conditions as described in **(A)**.

**A**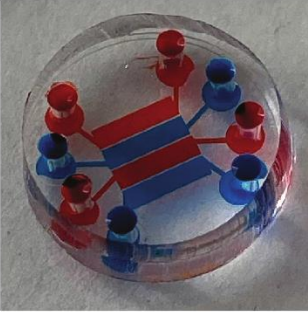**B**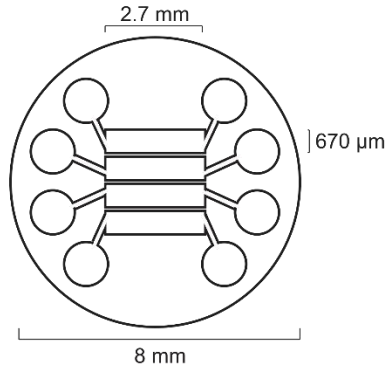**E**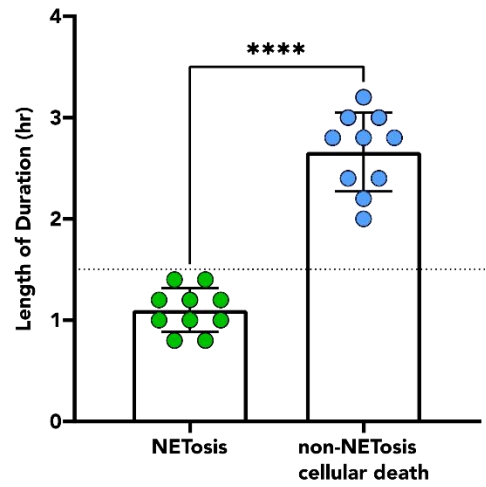**C**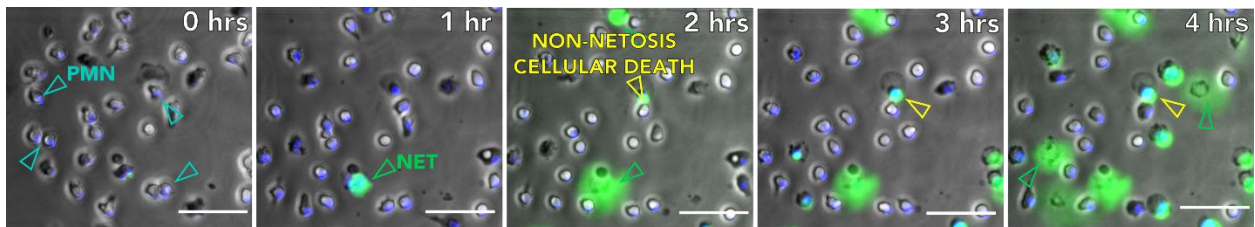**D**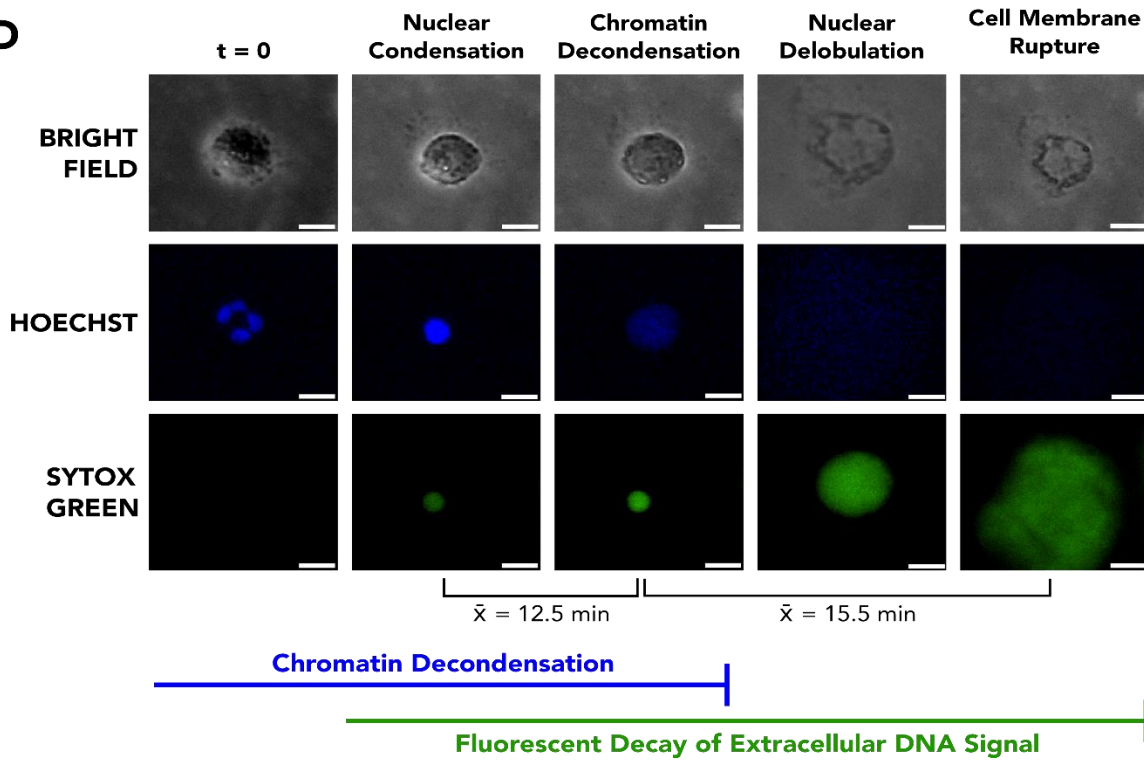



**Fig. S5. Design and schematic of the employed microfluidic device, related to Fig. 4 and 5, methodology and validation of quantification of NETosis.** (A) Microfluidic device used to visualize NET release over time. Dye showing four separated channels which allow for four simultaneous measurements. (B) Dimension of the microfluidic device used to visualize NET release over time. (C) Time-lapse images of NET formation and non-NETosis cellular death within the microfluidic devices. Neutrophil (PMN) nucleus was stained with Hoechst stain (DAPI), and extracellular DNA was stained with SYTOX green (FITC). Diffused SYTOX green staining and disrupted membrane seen in the brightfield channel over time was defined to be NETosis. Circular, stable SYTOX green staining and circular neutrophils were seen over time was defined as a cell undergoing non-NETosis cellular death. Scale bar = 50  $\mu$ M. (D) Visualization of a neutrophil undergoing NETosis through nuclear condensation, chromatin decondensation, nuclear delobulation, cell membrane rupture, and extracellular staining where there is, on average ( $n = 10$ ), 3 minutes between the changes in the nucleus and staining of the extracellular DNA. Scale bar = 10  $\mu$ M (E) Validation of quantification of NETosis. Neutrophils were manually tracked to determine the length of SYTOX green duration in NET release ( $n = 10$ ) and non-NETosis cellular death ( $n = 10$ ). NETs were determined to be SYTOX green staining detected for  $\leq 1.5$  hrs, and non-NETosis cellular death was defined as tracked cells with a duration  $> 1.5$  hrs. Significance was determined by 1-way ANOVA with multiple comparisons in GraphPad Prism v9. Mean values and standard deviation are presented. Statistical significance is defined as \*\*\*\*  $P < 0.0001$ .

**SUPPLEMENTAL TABLES**

**Table S1.** Demographics and clinical characteristics of pediatric acute COVID-19 patients included in the study, Related to Fig. 1, Tab. 1.

| <b>Patients with acute COVID-19 infection</b> | <b>Age (years)</b> | <b>Gender</b> | <b>SARS-CoV-2 RT-PCR On Admission</b> | <b>Hospitalized</b> | <b>Highest Level of Care</b> | <b>Treatment Required</b> | <b>Treated with Steroids</b> | <b>Respiratory Support Needed</b> | <b>O<sub>2</sub> Needed</b> | <b>Patient Intubated</b> |
|-----------------------------------------------|--------------------|---------------|---------------------------------------|---------------------|------------------------------|---------------------------|------------------------------|-----------------------------------|-----------------------------|--------------------------|
| 1                                             | 10                 | M             | (+)                                   | yes                 | ward                         | no                        | no                           | no                                | no                          | no                       |
| 2                                             | 14                 | M             | (+)                                   | yes                 | ward                         | no                        | no                           | no                                | no                          | no                       |
| 3                                             | 15                 | F             | (+)                                   | yes                 | ward                         | yes                       | no                           | yes                               | yes                         | no                       |
| 4                                             | 0.05               | M             | (+)                                   | yes                 | ward                         | yes                       | no                           | yes                               | yes                         | no                       |
| 5                                             | 16                 | F             | (+)                                   | yes                 | ward                         | yes                       | no                           | yes                               | yes                         | no                       |
| 6                                             | 2.5                | M             | (+)                                   | yes                 | PICU                         | yes                       | no                           | yes                               | yes                         | no                       |
| 7                                             | 12.6               | M             | (+)                                   | yes                 | ward                         | yes                       | no                           | yes                               | yes                         | yes                      |
| 8                                             | 13.81              | M             | (+)                                   | yes                 | PICU                         | yes                       | yes                          | yes                               | yes                         | no                       |
| 9                                             | 17.15              | M             | (+)                                   | yes                 | ward                         | no                        | no                           | no                                | no                          | no                       |
| 10                                            | 15.71              | M             | (+)                                   | yes                 | PICU                         | yes                       | no                           | yes                               | yes                         | no                       |
| 11                                            | 22.16              | M             | (+)                                   | yes                 | ward                         | yes                       | no                           | yes                               | no                          | no                       |
| 12                                            | 13                 | F             | (+)                                   | yes                 | PICU                         | no                        | no                           | no                                | no                          | no                       |
| 13                                            | 20.35              | M             | (+)                                   | yes                 | ward                         | yes                       | yes                          | no                                | no                          | no                       |
| 14                                            | 17.59              | F             | (+)                                   | yes                 | PICU                         | yes                       | yes                          | yes                               | yes                         | no                       |
| 15                                            | 21.99              | F             | (+)                                   | yes                 | ward                         | yes                       | yes                          | yes                               | yes                         | no                       |
| 16                                            | 21.86              | M             | (+)                                   | yes                 | ward                         | yes                       | yes                          | yes                               | yes                         | no                       |
| 17                                            | 19.15              | M             | (+)                                   | yes                 | ward                         | yes                       | yes                          | yes                               | yes                         | no                       |
| 18                                            | 1.55               | M             | (+)                                   | yes                 | ward                         | yes                       | no                           | yes                               | yes                         | no                       |
| 19                                            | 3.74               | M             | (+)                                   | yes                 | PICU                         | yes                       | yes                          | yes                               | yes                         | no                       |
| 20                                            | 16.33              | M             | (+)                                   | yes                 | PICU                         | no                        | no                           | yes                               | yes                         | no                       |
| 21                                            | 0.92               | M             | (+)                                   | yes                 | outpatient                   | no                        | no                           | no                                | no                          | no                       |
| 22                                            | 18                 | F             | (+)                                   | no                  | outpatient                   | no                        | no                           | no                                | no                          | no                       |
| 23                                            | 20                 | F             | (+)                                   | no                  | outpatient                   | no                        | no                           | no                                | no                          | no                       |

**Table S1.** Demographics and clinical characteristics of pediatric acute COVID-19 patients included in the study, Related to Fig. 1, Tab. 1 (continued).

| <b>Patients with acute COVID-19 infection</b> | <b>Age (years)</b> | <b>Gender</b> | <b>SARS-CoV-2 RT-PCR On Admission</b> | <b>Hospitalized</b> | <b>Highest Level of Care</b> | <b>Treatment Required</b> | <b>Treated with Steroids</b> | <b>Respiratory Support Needed</b> | <b>O<sub>2</sub> Needed</b> | <b>Patient Intubated</b> |
|-----------------------------------------------|--------------------|---------------|---------------------------------------|---------------------|------------------------------|---------------------------|------------------------------|-----------------------------------|-----------------------------|--------------------------|
| 24                                            | 20                 | M             | (+)                                   | no                  | outpatient                   | no                        | no                           | no                                | no                          | no                       |
| 25                                            | 16                 | F             | (+)                                   | no                  | outpatient                   | no                        | no                           | no                                | no                          | no                       |
| 26                                            | 13                 | M             | (+)                                   | no                  | outpatient                   | no                        | no                           | no                                | no                          | no                       |
| 27                                            | 13                 | M             | (+)                                   | no                  | outpatient                   | no                        | no                           | no                                | no                          | no                       |
| 28                                            | 19                 | M             | (+)                                   | no                  | outpatient                   | no                        | no                           | no                                | no                          | no                       |
| 29                                            | 17                 | F             | (+)                                   | no                  | outpatient                   | no                        | no                           | no                                | no                          | no                       |
| 30                                            | 15                 | F             | (+)                                   | no                  | outpatient                   | no                        | no                           | no                                | no                          | no                       |
| 31                                            | 16                 | M             | (+)                                   | no                  | outpatient                   | no                        | no                           | no                                | no                          | no                       |
| 32                                            | 10                 | M             | (+)                                   | no                  | outpatient                   | no                        | no                           | no                                | no                          | no                       |
| 33                                            | 19                 | F             | (+)                                   | no                  | outpatient                   | no                        | no                           | no                                | no                          | no                       |
| 34                                            | 2                  | F             | (+)                                   | no                  | outpatient                   | no                        | no                           | no                                | no                          | no                       |
| 35                                            | 17                 | M             | (+)                                   | no                  | outpatient                   | no                        | no                           | no                                | no                          | no                       |
| 36                                            | 10                 | F             | (+)                                   | no                  | outpatient                   | no                        | no                           | no                                | no                          | no                       |
| 37                                            | 21.4               | M             | (+)                                   | no                  | outpatient                   | no                        | no                           | no                                | no                          | no                       |
| 38                                            | 11.3               | M             | (+)                                   | no                  | outpatient                   | no                        | no                           | no                                | no                          | no                       |
| 39                                            | 18                 | M             | (+)                                   | no                  | outpatient                   | no                        | no                           | no                                | no                          | no                       |
| 40                                            | 15.2               | F             | (+)                                   | no                  | outpatient                   | no                        | no                           | no                                | no                          | no                       |
| 41                                            | 16                 | M             | (+)                                   | no                  | outpatient                   | no                        | no                           | no                                | no                          | no                       |
| 42                                            | 17.3               | M             | (+)                                   | no                  | outpatient                   | yes                       | yes                          | yes                               | yes                         | no                       |
| 43                                            | 12                 | M             | (+)                                   | no                  | outpatient                   | no                        | no                           | no                                | no                          | no                       |

**Table S2.** Demographics and clinical characteristics of pediatric MIS-C patients included in the study, Related to Fig. 1, Tab. 1.

| <b>Patients with MIS-C</b> | <b>Age (years)</b> | <b>Gender</b> | <b>SARS-CoV-2 RT-PCR On Admission</b> | <b>SARS-CoV-2 Antibody</b> | <b>COVID-19 Exposure</b> | <b>Highest Level of Care</b> | <b>Cardiovascular Involvement</b>                                     | <b>Treatment Required</b> | <b>Treated with IVIG</b> | <b>Treated with Steroids</b> | <b>Treated with Anikinra</b> |
|----------------------------|--------------------|---------------|---------------------------------------|----------------------------|--------------------------|------------------------------|-----------------------------------------------------------------------|---------------------------|--------------------------|------------------------------|------------------------------|
| 1                          | 2.9                | M             | n/a                                   | n/a                        | (+)                      | ward                         | no                                                                    | no                        | no                       | no                           | no                           |
| 2                          | 1.2                | M             | neg                                   | neg                        | (+)                      | ward                         | no                                                                    | no                        | no                       | no                           | no                           |
| 3                          | 1                  | F             | neg                                   | (+)                        | (+)                      | ward                         | no                                                                    | no                        | no                       | no                           | no                           |
| 4                          | 1.5                | M             | neg                                   | (+)                        | (+)                      | ward                         | no                                                                    | yes                       | yes                      | no                           | no                           |
| 5                          | 17                 | F             | neg                                   | (+)                        | (+)                      | ward                         | no                                                                    | yes                       | no                       | yes                          | no                           |
| 6                          | 2                  | F             | neg                                   | (+)                        | (+)                      | ward                         | no                                                                    | yes                       | yes                      | yes                          | no                           |
| 7                          | 18                 | F             | neg                                   | (+)                        | (+)                      | ward                         | no                                                                    | yes                       | no                       | tes                          | no                           |
| 8                          | 9                  | M             | neg                                   | neg                        | (+)                      | ward                         | no                                                                    | no                        | no                       | no                           | no                           |
| 9                          | 0.17               | M             | (+)                                   | n/a                        | (+)                      | ward                         | no                                                                    | no                        | no                       | no                           | no                           |
| 10                         | 0.17               | M             | neg                                   | neg                        | (+)                      | ward                         | no                                                                    | no                        | no                       | no                           | no                           |
| 11                         | 0.17               | F             | (+)                                   | n/a                        | (+)                      | ward                         | no                                                                    | no                        | no                       | no                           | no                           |
| 12                         | 1.34               | M             | neg                                   | (+)                        | (+)                      | PICU                         | no                                                                    | yes                       | yes                      | yes                          | yes                          |
| 13                         | 14.79              | M             | neg                                   | (+)                        | (+)                      | ward                         | myocarditis                                                           | no                        | no                       | no                           | no                           |
| 14                         | 7.6                | F             | n/a                                   | (+)                        | (+)                      | PICU                         | ventricular dysfunction (EF 48%), vasopressor support (epinephrine)   | yes                       | yes                      | yes                          | yes                          |
| 15                         | 2.6                | M             | neg                                   | neg                        | (+)                      | ward                         | atypical Kawasaki's, lack of coronary tapering                        | yes                       | yes                      | no                           | no                           |
| 16                         | 13.6               | M             | neg                                   | (+)                        | (+)                      | PICU                         | myocarditis                                                           | yes                       | yes                      | yes                          | yes                          |
| 17                         | 12.5               | M             | neg                                   | (+)                        | (+)                      | PICU                         | myocarditis, elevated NT-proBNP                                       | yes                       | yes                      | yes                          | yes                          |
| 18                         | 3.5                | M             | neg                                   | (+)                        | (+)                      | ward                         | coronary arterial aneurysm                                            | yes                       | yes                      | yes                          | no                           |
| 19                         | 7.11               | M             | (+)                                   | n/a                        | (+)                      | PICU                         | coronary aneurysm, elevated troponin, ventricular dysfunction (EF 48) | yes                       | yes                      | yes                          | no                           |
| 20                         | 21                 | M             | n/a                                   | (+)                        | (+)                      | PICU                         | myocarditis, ventricular dysfunction (EF 21%), vasopressor support    | yes                       | yes                      | yes                          | no                           |
| 21                         | 19.4               | F             | n/a                                   | (+)                        | (+)                      | PICU                         | extracorporeal membrane oxygenation                                   | yes                       | yes                      | yes                          | no                           |
| 22                         | 10.3               | M             | (+)                                   | (+)                        | (+)                      | PICU                         | ventricular dysfunction, vasopressor support, Mobitz type I and II    | yes                       | yes                      | yes                          | yes                          |
| 23                         | 9.63               | M             | n/a                                   | (+)                        | (+)                      | PICU                         | extracorporeal membrane oxygenation                                   | yes                       | yes                      | yes                          | no                           |
| 24                         | 8.27               | M             | neg                                   | (+)                        | (+)                      | PICU                         | ventricular dysfunction (EF 40)                                       | yes                       | yes                      | yes                          | no                           |

**Table S2.** Demographics and clinical characteristics of pediatric MIS-C patients included in the study, Related to Fig. 1, Tab. 1 (continued).

| <b>Patients with MIS-C</b> | <b>Age (years)</b> | <b>Gender</b> | <b>SARS-CoV-2 RT-PCR On Admission</b> | <b>SARS-CoV-2 Antibody</b> | <b>COVID-19 Exposure</b> | <b>Highest Level of Care</b> | <b>Cardiovascular Involvement</b>                                                                                                                          | <b>Treatment Required</b> | <b>Treated with IVIG</b> | <b>Treated with Steroids</b> | <b>Treated with Anikinra</b> |
|----------------------------|--------------------|---------------|---------------------------------------|----------------------------|--------------------------|------------------------------|------------------------------------------------------------------------------------------------------------------------------------------------------------|---------------------------|--------------------------|------------------------------|------------------------------|
| 25                         | 5.61               | F             | neg                                   | (+)                        | (+)                      | ward                         | ventricular dysfunction (EF 52%);<br>conduction defect (1st degree AV block)                                                                               | yes                       | yes                      | yes                          | no                           |
| 26                         | 9                  | M             | neg                                   | (+)                        | (+)                      | ward                         | elevated BNP,<br>coronary dilation or aneurysm                                                                                                             | yes                       | yes                      | yes                          | yes                          |
| 27                         | 3                  | F             | (+)                                   | (+)                        | (+)                      | PICU                         | bradycardia                                                                                                                                                | yes                       | no                       | yes                          | no                           |
| 28                         | 9                  | M             | neg                                   | (+)                        | (+)                      | PICU                         | elevated troponin and pro-BNP                                                                                                                              | yes                       | yes                      | no                           | no                           |
| 29                         | 7                  | M             | neg                                   | (+)                        | (+)                      | PICU                         | dilated left ventricle                                                                                                                                     | yes                       | yes                      | yes                          | yes                          |
| 30                         | 4                  | M             | (+)                                   | (+)                        | (+)                      | ward                         | coronary dilation or aneurysm                                                                                                                              | yes                       | yes                      | yes                          | no                           |
| 31                         | 8                  | M             | neg                                   | (+)                        | (+)                      | PICU                         | hypotension, ventricular failure,<br>extracorporeal membrane oxygenation,<br>arrhythmia, elevated troponin, elevated<br>bnp, coronary dilation or aneurysm | yes                       | yes                      | yes                          | yes                          |
